# Supplementary material
Source: Springer Nature journal article supplement (https://mijn.bsl.nl/resource/supplementary/13047_2008_12_MOESM4_ESM.pdf/7108724)

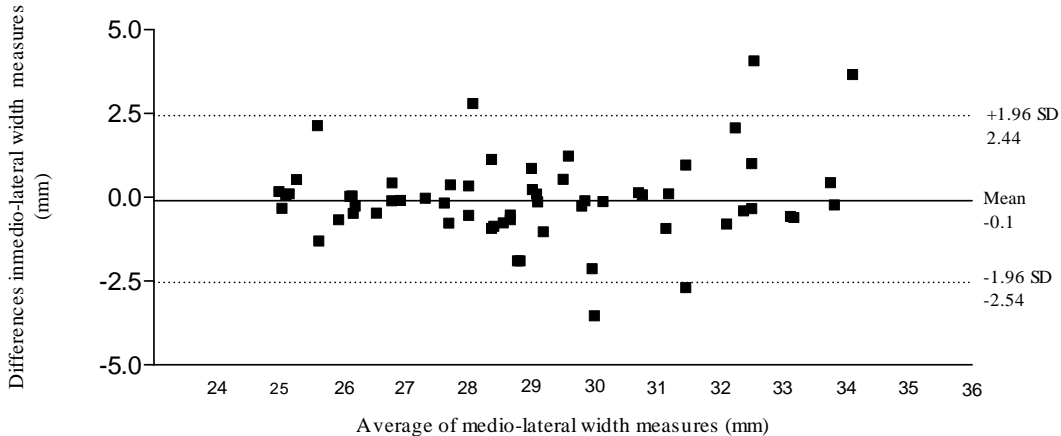

Supplement: MOESM4 [file 7108724]
